# Supplementary material for: The Influence of Nordic Walking on Spinal Posture, Physical Function, and Back Pain in Community-Dwelling Older Adults: A Pilot Study
Source: MDPI journal article supplement (doi:10.3390/healthcare9101303), 2021-09-30
Supplement: s1 [file s1]

**Table S1. 12 weeks of Nordic walking training program**

| Session                              | Intensity by RPE |           | Exercises                                                                                                       |
|--------------------------------------|------------------|-----------|-----------------------------------------------------------------------------------------------------------------|
|                                      | Week 1-6         | Week 7-12 |                                                                                                                 |
| Warm-up (10 min)                     | 3-4              | 3-4       | Light step aerobics (3-5 min)<br>Full body stretching (5 min)                                                   |
| Pole strengthening<br>(20 min)       | 3-4              | 5-6       | Chest, shoulder, back, arm, abdominal<br>muscles and leg exercises<br>10 repetitions, 2 sets, with elastic band |
| Nordic walking<br>(30 min)           | 3-4              | 5-6       | Normal speed (10 min) → fast speed (10 min)<br>→ normal speed (10 min)                                          |
| Pole aerobic and<br>balance (20 min) | 3-4              | 5-6       | Pole aerobic exercises (10 min)<br>Pole balance exercises (10 min)                                              |
| Cool-down (20 min)                   | 3-4              | 3-4       | Full body stretching (20 min)                                                                                   |

Note. RPE = Rating of Perceived Exertion (scale 0-10)
